# Supplementary material for: By activating matrix metalloproteinase-7, shear stress promotes chondrosarcoma cell motility, invasion and lung colonization
Source: PubMed Central journal article supplement (PMC4496208; doi:10.18632/oncotarget.3274), 2015-03-14
Supplement: oncotarget-06-9140-s001.pdf [file oncotarget-06-9140-s001.pdf]

SUPPLEMENTARY FIGURES

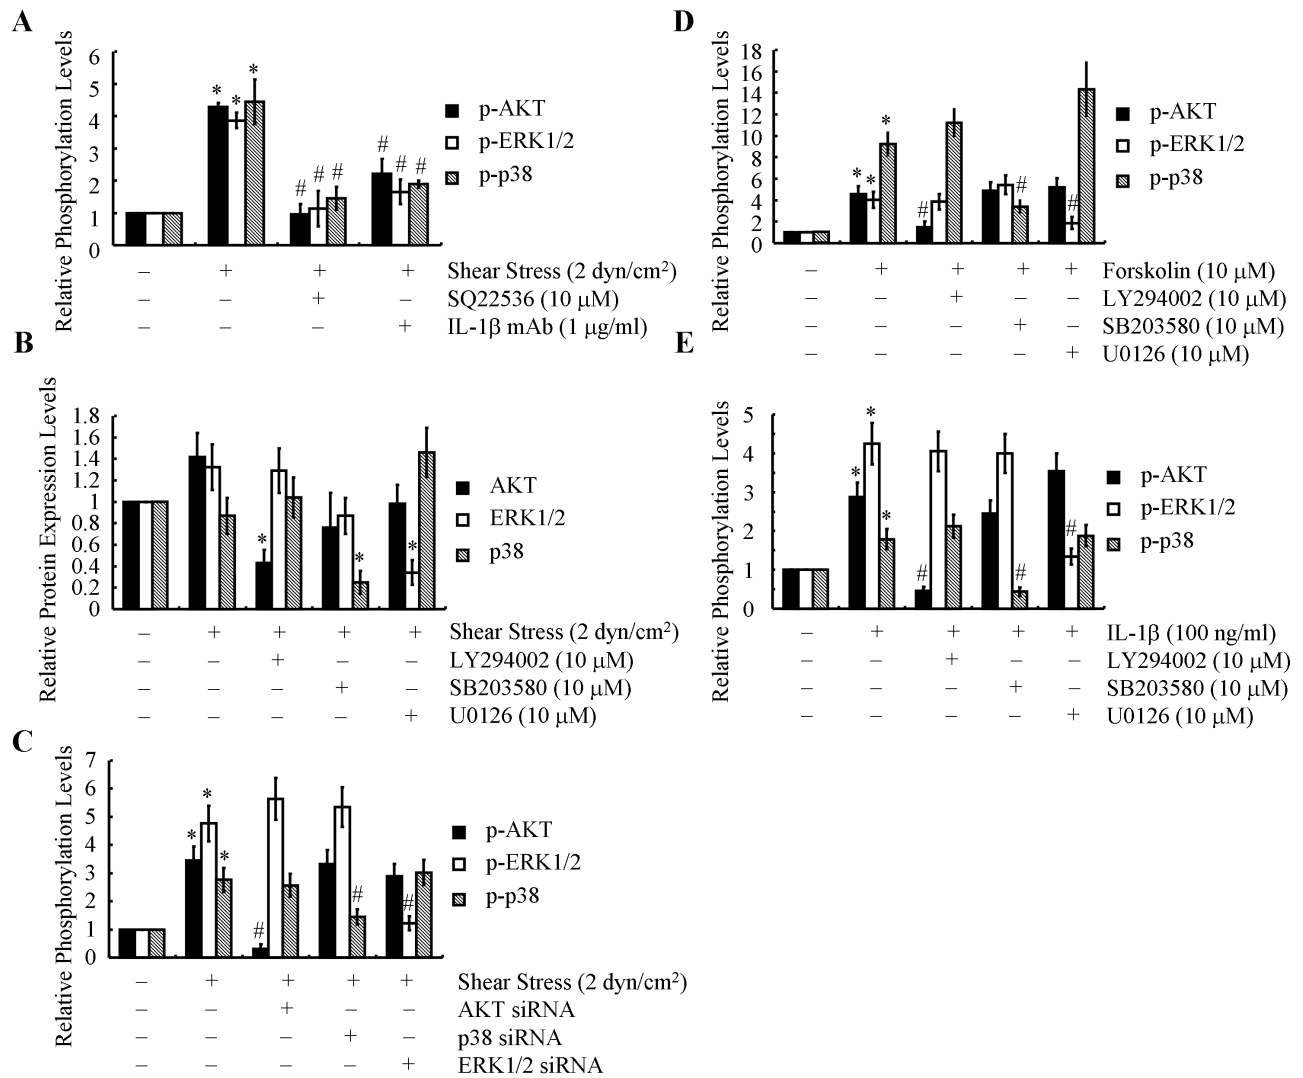

Supplementary Figure S1: The Statistical analysis of western blots in Figure 2.

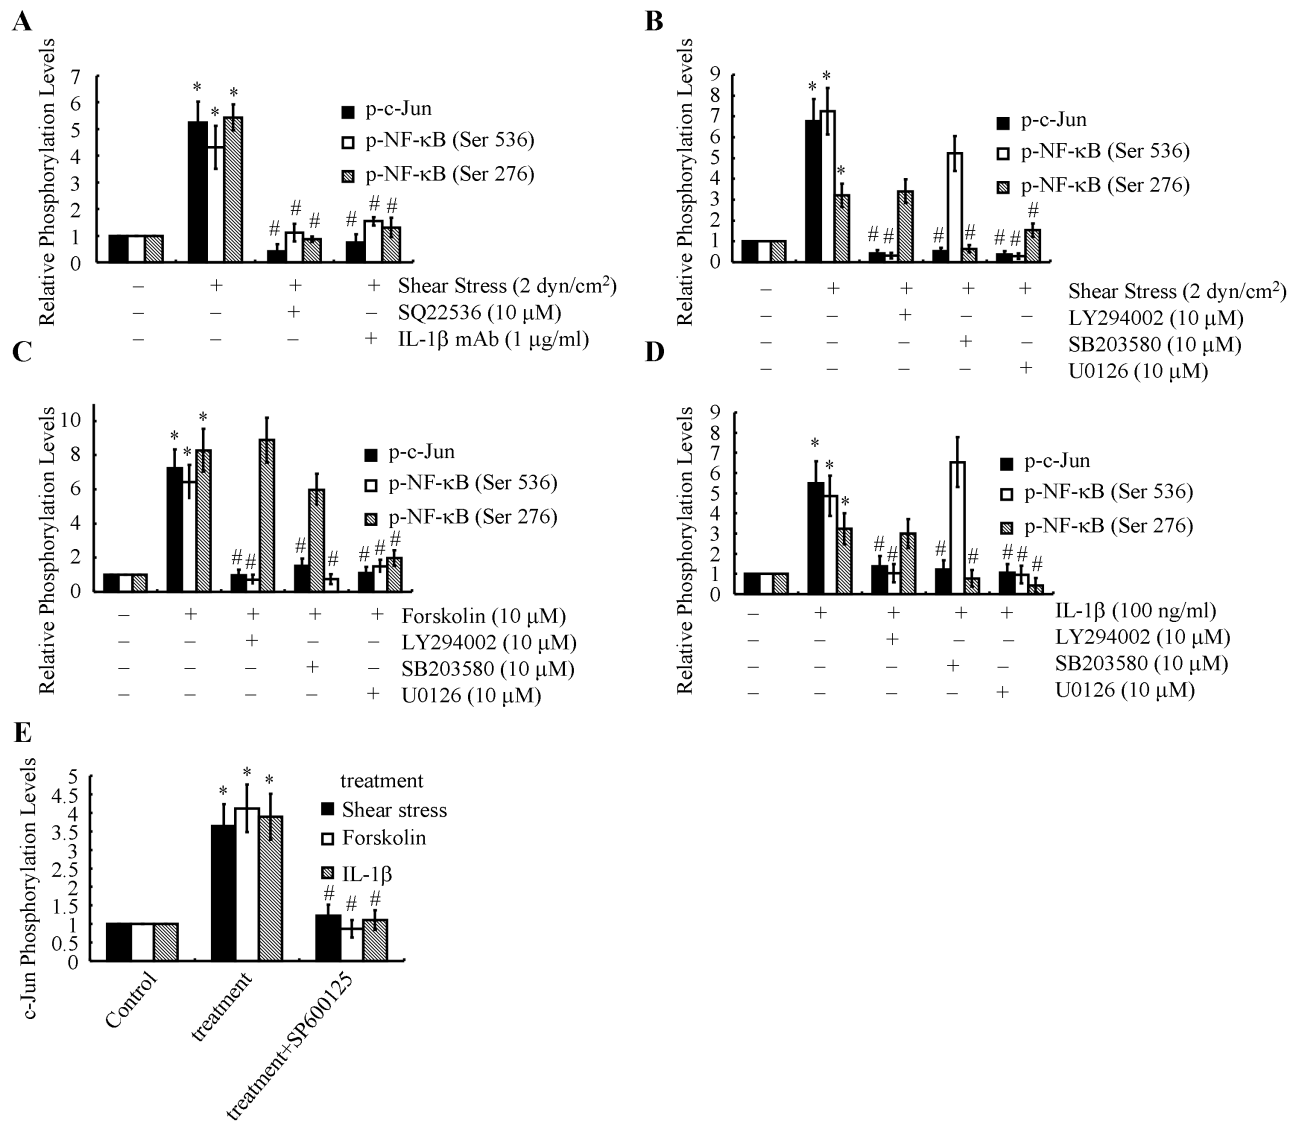

Supplementary Figure S2: The Statistical analysis of western blots in Figure 3.
